# Supplementary material for: Integrative ChIP-seq/Microarray Analysis Identifies a CTNNB1 Target Signature Enriched in Intestinal Stem Cells and Colon Cancer
Source: PLoS One. 2014 Mar 20;9(3):e92317. doi: 10.1371/journal.pone.0092317 (PMC3961325; doi:10.1371/journal.pone.0092317)
Supplement: Table S1 — List of direct and functional β-catenin targets. (XLS) [file pone.0092317.s001.xls]

## Sheet: Sheet1
Table S1. List of direct and functional b-catenin targets.
Gene/protein Name	Gene ID	p val shRNA_1	Log expression shRNA_1	p val shRNA_2	Log expression shRNA_2	Peak_location
ABHD12B	145447	0	-0.36	0	-0.5	chr14:50411700-50412245
ABHD6	57406	1.32e-18	-0.61	3.97e-18	-0.59	chr3:58217264-58217597
ACSS2	55902	1.11e-11	-0.28	1.19e-08	-0.26	chr20:32927330-32927908
AMDHD1	144193	1.3e-08	-0.3	3.78e-14	-0.39	chr12:94860891-94861074
ANKRD1	27063	1.42e-13	-0.43	5.97e-13	-0.4	chr10:92681089-92681386
ANKRD38	163782	1.53e-28	-1.4	2.32e-35	-1.56	chr1:62571573-62572115
ANKRD57	65124	9.01e-33	-0.34	2.29e-27	-0.29	chr2:109728731-109729152
APCDD1	147495	1.69e-12	-0.83	5.43e-10	-0.68	chr18:10444440-10444704
ARFIP1	27236	2.82e-07	-0.28	3.64e-07	-0.28	chr4:153920327-153920639
ASPSCR1	79058	8.18e-15	-0.87	2.06e-22	-0.9	chr17:77543410-77543988
ATP12A	479	1.18e-06	-0.56	3.93e-05	-0.4	chr13:24141266-24141548
AXIN2	8313	0	-1.12	0	-0.97	chr17:60987972-60988552
BMP7	655	4.66e-17	-0.49	4.35e-09	-0.29	chr20:55291043-55291182
C10orf118	55088	1.63e-20	-0.41	5.17e-20	-0.46	chr10:115923904-115924305
C12orf34	84915	1.53e-15	-0.45	1.56e-10	-0.33	chr12:108654487-108654643
C12orf4	57102	5.12e-07	-0.28	5.3e-06	-0.27	chr12:4511043-4511358
C16orf30	79652	5.33e-21	-0.92	4.09e-19	-1.04	chr16:1526058-1526309
C20orf118	140711	2.29e-05	-0.25	9.57e-06	-0.22	chr20:34923867-34924180
C20orf19	55857	8.66e-33	-1.03	1.18e-26	-0.9	chr20:21063585-21064121
C3orf21	152002	7.62e-05	-0.24	0.000243	-0.22	chr3:196461772-196462390
C6orf130	221443	8.03e-09	-0.28	2.75e-08	-0.26	chr6:41148080-41148521
C6orf97	80129	1.59e-26	-0.76	2.76e-08	-0.68	chr6:151864700-151864921
C7orf52	375607	3.72e-09	-0.69	4.54e-14	-0.54	chr7:100608329-100608531
CCDC84	338657	0	-0.21	0.000298	-0.26	chr11:118374837-118375160
CDX2	1045	1.44e-21	-0.67	7.61e-21	-0.72	chr13:27438867-27439188
CEP78	84131	4.43e-25	-0.7	1.23e-22	-0.55	chr9:80041352-80041598
CHRNA3	1136	2.25e-06	-0.31	0.000375	-0.27	chr15:76703286-76703426
CHST13	166012	4.37e-11	-0.38	7.75e-15	-0.44	chr3:127726623-127726832
CKMT2	1160	2.29e-26	-1.2	8.6e-32	-0.97	chr5:80566533-80566978
CPXM1	56265	9e-26	-0.7	9.92e-23	-0.68	chr20:2727466-2727865
CRABP2	1382	5.14e-19	-0.81	7.88e-19	-0.5	chr1:154942530-154943389
CRYGN	155051	3.28e-23	-0.61	1.72e-12	-0.45	chr7:150757824-150758366
CST9	128822	4.87e-07	-0.27	4.41e-08	-0.28	chr20:23539438-23539678
CTR9	9646	3.63e-09	-0.37	6.22e-10	-0.39	chr11:10713854-10714252
CTSZ	1522	1.77e-13	-0.42	3.96e-07	-0.26	chr20:57013413-57013949
CXCL14	9547	2.86e-29	-1.18	4.44e-27	-1.17	chr5:134933845-134934101
CXCR4	7852	6.62e-27	-0.98	3.72e-24	-0.9	chr2:136575281-136575437
CXCR6	10663	2.19e-16	-0.72	3.24e-14	-0.63	chr3:45959005-45959372
DDX26B	203522	7.68e-09	-0.31	6.25e-05	-0.22	chrX:134482053-134482384
DEPDC7	91614	1.11e-29	-0.81	3.14e-33	-0.87	chr11:32983335-32983792
DLX2	1746	2.07e-05	-0.36	2.11e-05	-0.32	chr2:172668275-172668573
DLX4	1748	8.13e-13	-0.45	2.07e-16	-0.52	chr17:45385363-45386066
DOCK11	139818	2.22e-17	-0.56	5.23e-15	-0.64	chrX:117515199-117515432
EDAR	10913	1.95e-28	-1.27	6.63e-32	-1.17	chr2:108954694-108955399
EFNA4	1945	7.14e-12	-0.37	9.15e-07	-0.25	chr1:153308929-153309297
EN2	2020	2.53e-10	-0.44	3.58e-06	-0.3	chr7:154958301-154958633
ENTPD8	377841	1.78e-12	-0.52	3.31e-11	-0.46	chr9:139464266-139464757
ETV3	2117	6.62e-09	-0.5	2.35e-08	-0.55	chr1:155391388-155392041
FASLG	356	0	-1.17	0	-1.01	chr1:170879565-170880009
FGF19	9965	2.41e-29	-0.84	1.31e-22	-0.8	chr11:69227732-69228429
FGF3	2248	1.39e-24	-0.71	2.29e-21	-0.55	chr11:69352272-69352645
FGF9	2254	1.63e-10	-0.31	5.52e-14	-0.41	chr12:107650015-107650314
FLJ11710	79904	1.42e-12	-0.46	9.61e-07	-0.26	chr17:52727441-52727856
FLJ35767	400629	1.79e-14	-0.53	2.45e-10	-0.37	chr17:77908190-77908511
FRAS1	80144	1.99e-10	-0.36	2.27e-08	-0.38	chr4:79196446-79197031
FYN	2534	1.44e-10	-0.43	9.66e-11	-0.38	chr6:112301191-112301571
GABARAPL1	23710	5.45e-11	-0.35	4.94e-10	-0.37	chr12:10256172-10256461
GLI3	2737	7.17e-29	-0.36	9.77e-22	-0.32	chr7:42253350-42254005
GPSM2	29899	3.75e-10	-0.29	0.000207	-0.23	chr1:109229224-109229416
GSDM1	284110	0	-0.21	4.43e-05	-0.24	chr17:35376593-35377034
GSTA4	2941	5.12e-22	-0.45	9.8e-10	-0.27	chr6:52967549-52967830
GYLTL1B	120071	1.11e-09	-0.34	3.83e-07	-0.28	chr11:45900345-45900960
HSDL1	83693	9.67e-05	-0.26	6.18e-05	-0.26	chr16:82730274-82730570
HUNK	30811	2.09e-21	-0.73	1.18e-15	-0.63	chr21:32173485-32173962
HYAL1	3373	9.4e-12	-0.61	6.21e-11	-0.66	chr3:50329756-50330132
ID2	3398	2.05e-18	-0.84	2.58e-13	-0.68	chr2:8736279-8736590
IFI27	3429	2.82e-23	-0.92	3.06e-26	-0.94	chr14:93651094-93651539
IL10	3586	2.91e-39	-1.23	3.57e-30	-0.99	chr1:205006212-205006779
IL10RA	3587	1.02e-07	-0.3	1.55e-06	-0.28	chr11:22613298-22613562
IL17RD	54756	1.35e-07	-0.6	1.75e-12	-0.5	chr3:57168350-57168716
KCNQ1DN	55539	2.58e-27	-0.96	1.45e-09	-0.48	chr11:2850477-2850699
KIAA0888	26049	2.04e-21	-0.56	7.36e-18	-0.46	chr5:74216807-74217041
KIAA0895	23366	1.75e-08	-0.39	5.17e-11	-0.48	chr7:36409893-36409999
KIAA1199	57214	8.58e-23	-1.11	4.59e-31	-1.05	chr15:78861819-78861993
KIAA1274	27143	2.91e-22	-0.61	1.93e-12	-0.46	chr10:71907473-71907827
KLRG1	10219	1.04e-10	-0.38	1.01e-08	-0.35	chr12:9024418-9024812
KRT20	54474	0	-0.26	0.000354	-0.27	chr17:36314539-36314746
KRT23	25984	1.54e-35	-1.05	7.37e-29	-0.92	chr17:36366547-36366895
KRT71	112802	1.53e-34	-1.03	4.24e-21	-0.94	chr12:51231408-51231769
KRT74	121391	3.6e-30	-1.22	3.45e-32	-1.19	chr12:51259441-51259938
LEF1	51176	2.1e-23	-0.67	3.55e-24	-0.6	chr4:109192016-109192326
LGR6	59352	6.24e-15	-0.44	2.45e-15	-0.42	chr1:200420523-200420703
LHX4	89884	0.000874	-0.23	0	-0.22	chr1:178465905-178466173
LINCR	93082	6.37e-07	-0.27	2.36e-11	-0.42	chr2:96522493-96522899
LMBR1	64327	2.24e-06	-0.26	7.63e-07	-0.29	chr7:156388920-156389332
LOC145757	145757	3.4e-08	-0.26	2.94e-06	-0.24	chr15:99200697-99200964
LOC157860	157860	7.27e-09	-0.36	0.000533	-0.29	chr8:37575964-37576147
LOC286002	286002	1.28e-21	-0.59	3.42e-11	-0.57	chr7:107089279-107089778
LOC340073	340073	2.1e-09	-0.31	2.2e-05	-0.43	chr5:134629761-134630045
LOC644662	644662	6.01e-08	-0.3	5.29e-07	-0.31	chr3:127462472-127462818
LRIG1	26018	2.81e-15	-0.41	2.81e-07	-0.25	chr3:66614150-66614480
LRRC2	79442	8.63e-05	-0.21	1.07e-05	-0.21	chr3:46595514-46595729
MAP3K8	1326	5.7e-10	-0.37	8.77e-15	-0.53	chr10:30765260-30765478
MFSD11	79157	1.16e-08	-0.32	2.4e-05	-0.24	chr17:72245490-72245919
MSX1	4487	2.02e-16	-0.86	1.91e-17	-0.81	chr4:4909328-4909889
MTSS1	9788	9.34e-12	-0.56	4.09e-14	-0.59	chr8:125793826-125794145
MYH7B	57644	5.27e-18	-1.3	1.1e-21	-1.36	chr20:33022601-33023878
MYO1D	4642	2.55e-16	-0.55	5.02e-10	-0.35	chr17:28227474-28228153
MYO1F	4542	3.35e-12	-0.37	7.49e-09	-0.42	chr19:8546637-8546889
NAPG	8774	1.39e-08	-0.21	9.03e-14	-0.3	chr18:10515050-10515497
NEK9	91754	9.33e-08	-0.32	3.59e-10	-0.3	chr14:74675781-74676016
NELF	26012	3.17e-20	-0.63	2.38e-25	-0.63	chr9:139464886-139465180
NKD1	85407	8.22e-24	-1.09	2.82e-28	-1.12	chr16:49139505-49139934
NKD2	85409	9.07e-09	-0.35	2.06e-09	-0.41	chr5:1056020-1056167
NKPD1	284353	2.76e-05	-0.24	8.35e-05	-0.23	chr19:50349664-50349912
NLRP11	204801	2.28e-35	-1.05	9.45e-22	-0.9	chr19:61035563-61035764
NOLC1	9221	5.04e-06	-0.25	8.27e-06	-0.22	chr10:103901692-103902243
NOS2A	4843	1.2e-14	-0.51	2.34e-13	-0.52	chr17:23149001-23149480
NOTUM	147111	2.54e-18	-1.35	6.08e-16	-1.16	chr17:77518010-77518353
NPNT	255743	3.31e-13	-0.77	6.87e-13	-0.56	chr4:107035022-107035180
NR2F1	7025	1.95e-24	-0.46	1.89e-17	-0.37	chr5:92944456-92944626
NUDT4	11163	1.48e-07	-0.28	4.67e-11	-0.38	chr12:92294480-92294638
OXGR1	27199	4.87e-21	-0.77	6.98e-19	-0.79	chr13:96454774-96454973
PAG1	55824	1.69e-05	-0.25	3.97e-05	-0.41	chr8:82186713-82186917
PBX4	80714	1.19e-05	-0.29	1.95e-07	-0.32	chr19:19585348-19585699
PCMTD2	55251	4.39e-12	-0.37	1.09e-06	-0.24	chr20:62329025-62329382
PCP4	5121	0.000379	-0.21	0	-0.23	chr21:40161057-40161211
PIM1	5292	3.56e-08	-0.33	5.64e-08	-0.32	chr6:37245253-37245774
PKIG	11142	5.92e-40	-0.52	1.61e-42	-0.54	chr20:42594765-42595138
PKP2	5318	7.26e-08	-0.3	7.49e-06	-0.29	chr12:32941107-32941508
PLEKHO1	51177	3.29e-14	-0.41	7.07e-11	-0.35	chr1:148396183-148396529
PPP1R2	5504	1.52e-23	-0.6	3.02e-21	-0.65	chr3:196758881-196759225
PRMT3	10196	8.3e-05	-0.23	2.73e-05	-0.24	chr11:20365543-20365970
PROX1	5629	2.45e-08	-0.5	3.94e-08	-0.46	chr1:212222807-212223022
PSTPIP2	9050	2.14e-07	-0.38	3.95e-14	-0.56	chr18:41886232-41886459
PVALB	5816	2.23e-15	-0.49	1.99e-05	-0.37	chr22:35557224-35557484
RAB11FIP4	84440	0.000993	-0.53	0	-0.22	chr17:26732309-26732563
RASL10B	91608	1.1e-18	-0.51	7.74e-16	-0.52	chr17:31082580-31082787
RASL11B	65997	5.68e-20	-0.7	1.12e-22	-0.74	chr4:53422958-53423192
RTKN	6242	4.47e-06	-0.22	0.000243	-0.24	chr21:34645933-34646163
S100A3	6274	2.32e-13	-0.56	2.27e-19	-0.58	chr1:151789201-151789617
SASP	151516	1.01e-15	-0.54	2.9e-09	-0.42	chr2:70056638-70057190
SDK1	221935	2.74e-10	-0.29	1.38e-21	-0.31	chr7:3305086-3305363
SEPT4	5414	5.67e-22	-0.55	4.42e-18	-0.46	chr17:53967799-53968166
SLC16A1	6566	9.46e-20	-0.44	8.45e-19	-0.43	chr1:113300261-113300648
SLC7A6	9057	2.55e-33	-0.47	5.29e-08	-0.21	chr16:66856749-66857274
SLC7A8	23428	2.62e-38	-0.53	1.11e-43	-0.52	chr14:22716667-22716882
SMAD7	4092	1.13e-05	-0.21	6.63e-08	-0.28	chr18:44724680-44724889
SMTNL2	342527	3.67e-05	-0.53	3.16e-08	-0.4	chr17:4443184-4443796
SNX25	83891	3.99e-09	-0.28	1.37e-09	-0.29	chr4:186369837-186370138
SORBS2	8470	3.29e-07	-0.54	2.02e-05	-0.5	chr4:187103847-187104053
SP5	389058	2.65e-35	-1.4	3.04e-38	-1.25	chr2:171279824-171280317
STX3	6809	8.07e-09	-0.31	0.000288	-0.45	chr11:59273383-59273664
SYK	6850	0	-1.06	0	-0.99	chr9:92659183-92659611
TDGF1	6997	2.62e-37	-1.23	2.74e-27	-1.13	chr3:46,595,515-46,595,729
THSD3	145501	7.72e-09	-0.36	4.86e-10	-0.46	chr14:77035035-77035429
TMEM47	83604	3.86e-24	-0.71	8.13e-28	-0.68	chrX:34585293-34585712
TNFRSF11B	4982	0	-1	0	-1.33	chr8:120040387-120040609
TNFRSF19	55504	0	-1.32	1.16e-33	-1.12	chr13:23051256-23051676
TNFRSF1B	7133	6.36e-08	-0.26	4.38e-05	-0.22	chr1:12161697-12162158
TNIK	23043	4.04e-05	-0.29	3.61e-06	-0.31	chr3:172660824-172661140
TNNC1	7134	3.78e-17	-0.52	3.8e-25	-0.64	chr3:52464309-52464617
TREM2	54209	2.88e-22	-1.08	5.9e-28	-1.06	chr6:41247291-41247513
TTC29	83894	7.63e-18	-0.73	1.9e-20	-0.7	chr4:148084669-148084970
UBXD3	127733	2e-21	-0.54	3.86e-10	-0.4	chr1:20384423-20384774
UGT8	7368	2.08e-20	-0.39	1.85e-10	-0.22	chr4:115738974-115739351
VEPH1	79674	1.46e-16	-0.69	5.4e-07	-0.32	chr3:158694546-158695106
WNT11	7481	1.7e-19	-0.58	1.22e-06	-0.27	chr11:75599883-75600133
WNT6	7475	1.15e-25	-0.85	2.3e-18	-0.68	chr2:219433859-219434311
YAF2	10138	9.64e-07	-0.33	2.73e-05	-0.26	chr12:40918348-40918647
ZAP70	7535	4.22e-28	-0.99	4.18e-23	-0.91	chr2:97702057-97702330
ZNRF3	84133	9.75e-19	-0.59	1.61e-19	-0.52	chr22:27625354-27625497
